# Supplementary material for: Evaluation of the effect of agroclimatic variables on the probability and timing of olive fruit fly attack
Source: PubMed Central journal article supplement (PMC11284310; doi:10.3389/fpls.2024.1401669), 2024-07-15
Supplement: DataSheet_1.pdf [file DataSheet_1.pdf]

Table S1: Comparisons of the different models for the effect of explanatory variables on the probability of occurrence of the first active infestation (1% threshold) within the period July-August or September-October of all years from 2015 to 2021. The best fit model is highlighted in bold.

| Response variable         | Explanatory variables                                                                       | random intercept     | AIC           | Model comparison                                                                                 |
|---------------------------|---------------------------------------------------------------------------------------------|----------------------|---------------|--------------------------------------------------------------------------------------------------|
| Months: July-August       | model #1: DEM, LAKES, TEMP (MAR-MAY), TEMP (NOV-FEB), CDD (PLANT), TEMP (-7D), SWB, MAN, CV | YEAR, ORCHARD        | 981.17        | vs. best model: $\Delta AIC = 9.21$ , Chisq = 2.79, P = 0.83                                     |
|                           | <b>model #2: DEM, TEMP (MAR-MAY), TEMP (NOV-FEB), CDD (PLANT), SWB</b>                      | <b>YEAR, ORCHARD</b> | <b>971.97</b> | <b>vs. intercept only model: <math>\Delta AIC = 114.04</math>, Chisq = 124.04, P &lt; 0.0001</b> |
| Months: September-October | model #1: DEM, LAKES, TEMP (MAR-MAY), TEMP (NOV-FEB), CDD (PLANT), TEMP (-7D), SWB, MAN, CV | YEAR, ORCHARD        | 806.08        | vs. best model: $\Delta AIC = 7.90$ , Chisq = 6.10, P = 0.53                                     |
|                           | <b>model #2: TEMP (MAR-MAY), TEMP (NOV-FEB), TEMP (-7D), SWB</b>                            | <b>YEAR, ORCHARD</b> | <b>798.18</b> | <b>vs. intercept only model: <math>\Delta AIC = 25.02</math>, Chisq = 33.02, P &lt; 0.0001</b>   |

Table S2: Comparisons of the different models for the effect of explanatory variables on the Julian day of the occurrence of the first active infestation within the period July-August or September-October (years 2015, 2016, 2018, 2019, 2020, 2021). The best fit model is highlighted in bold.

| Response variable         | Explanatory variables                                                                       | random intercept | AIC           | Model comparison                                                                                    |
|---------------------------|---------------------------------------------------------------------------------------------|------------------|---------------|-----------------------------------------------------------------------------------------------------|
| Months: July-August       | model #1: DEM, LAKES, TEMP (MAR-MAY), TEMP (NOV-FEB), CDD (PLANT), TEMP (-7D), SWB, MAN, CV | YEAR             | 547.44        | vs. best model: $\Delta AIC = 2.68$ , L. Ratio = 6.22, P = 0.18                                     |
|                           | <b>model #2: DEM, LAKES, TEMP (MAR-MAY), TEMP (NOV-FEB), CDD (PLANT), TEMP (-7D), SWB</b>   | <b>YEAR</b>      | <b>544.76</b> | <b>vs. intercept only model: <math>\Delta AIC = 446.42</math>, L. Ratio = 472.56, P &lt; 0.0001</b> |
| Months: September-October | model #1: DEM, LAKES, TEMP (MAR-MAY), TEMP (NOV-FEB), CDD (PLANT), TEMP (-7D), SWB, MAN, CV | YEAR             | 868.7         | vs. best model: $\Delta AIC = -6.85$ , L. Ratio = 6.41, P = 0.49                                    |
|                           | <b>model #2: TEMP (MAR-MAY), CDD (PLANT), TEMP (-7D), DEM</b>                               | <b>YEAR</b>      | <b>875.55</b> | <b>vs. intercept only model: <math>\Delta AIC = 83.09</math>, L. Ratio = 87.44, P &lt; 0.0001</b>   |
